# Supplementary material for: Sonochemical oxidation of technical lignin to obtain nanoparticles with enhanced functionality
Source: Royal Society of Chemistry journal article supplement (doi:10.1039/d3gc01037f), 2023-01-01
Supplement: d3gc01037f1.pdf [file d3gc01037f1.pdf]

# Sonochemical oxidation of technical lignin to obtain nanoparticles with enhanced functionality

Nagore Izaguirre<sup>a</sup>, Javier Fernández-Rodríguez<sup>a</sup>, Eduardo Robles<sup>b</sup>, Jalel Labidi<sup>a\*</sup>

<sup>a</sup>Biorefinery Processes Group, Chemical and Environmental Engineering Department, Engineering Faculty of Gipuzkoa, University of the Basque Country UPV/EHU, Plaza Europa 1, 20018 Donostia, Spain

<sup>b</sup>University of Pau and the Adour Region, E2S UPPA, CNRS, Institute of Analytical and Physicochemical Sciences for the Environment and Materials (IPREM-UMR 5254), 403 Rue de Saint Pierre, 40004 Mont de Marsan, France

\*Corresponding author contact: [jalel.labidi@ehu.eus](mailto:jalel.labidi@ehu.eus)

Table S1. Estimated effects for Z Potential

| FACTOR     | ESTIMATED | STANDARD ERROR | V.I.F. |
|------------|-----------|----------------|--------|
| MEAN       | -31.7408  | 1.16813        |        |
| A:TEMP     | 5.19333   | 1.27962        | 1.0    |
| B:TIME     | -3.35417  | 1.27962        | 1.0    |
| C:PEROXYDE | 4.72111   | 1.04481        | 1.0    |
| AA         | -8.05     | 2.21637        | 1.0    |
| AB         | -1.13     | 1.56721        | 1.0    |
| AC         | -5.26167  | 1.27962        | 1.0    |
| BB         | -0.7075   | 2.21637        | 1.0    |
| BC         | 0.7575    | 1.27962        | 1.0    |

\*Standard errors based on the total error with 9 g/L

This table shows the estimations for each of the experimental factors and the interactions. It also shows the standard error of every factor, which measures the error of the sampling. The highest variance inflation factor (V.I.F.), is equal to 1.0. for a perfectly orthogonal design, all the factors would be 1. Factors of 10 or more are interpreted as seriously confusing indicatives between the effects.

Table S2. Analysis of Variance for Z potential

| SOURCE    | SUM OF SQUARES | GL | MEAN SQUARES | F-REASON | P-VALUE |
|-----------|----------------|----|--------------|----------|---------|
| A:TEMP    | 80.9121        | 1  | 80.9121      | 16.47    | 0.0028  |
| B:TIME    | 33.7513        | 1  | 33.7513      | 6.87     | 0.0278  |
| C:PEROXYD | 100.3          | 1  | 100.3        | 20.42    | 0.0014  |
| E         |                |    |              |          |         |
| AA        | 64.8025        | 1  | 64.8025      | 13.19    | 0.0055  |
| AB        | 2.5538         | 1  | 2.5538       | 0.52     | 0.4892  |
| AC        | 83.0554        | 1  | 83.0554      | 16.91    | 0.0026  |
| BB        | 0.500556       | 1  | 0.500556     | 0.10     | 0.7568  |
| BC        | 1.72142        | 1  | 1.72142      | 0.35     | 0.5684  |

|                      |         |    |         |
|----------------------|---------|----|---------|
| <b>TOTAL ERROR</b>   | 44.2108 | 9  | 4.91231 |
| <b>TOTAL (CORR.)</b> | 411.808 | 17 |         |

Square-R = 89.2642 %  
 Square-R (adjusted for g.l.) = 79.7213 %  
 Standard error of the est. = 2.21637  
 Absolute mean error = 1.33045  
 Durbin-Watson statistic = 1.70916 (p=0,2060)  
 Residual autocorrelation of lag 1 = 0.116644

The ANOVA table divides the variability of the size into separate segments for each of the effects. This proves the statistical significance of each effect comparing its least square against an estimate of the experimental standard error. In this case, 5 effects have a p-value below 0.05, thus indicating that they are significantly different from zero with a confidence level of 95.0%.

The statistic Square-R indicates that the model, fitted like that, explains 89.2642% of the variability in the Z Potential. The fitted statistic R-square, which is the most suitable for comparing models with the different numbers of independent variables, is 79.7213%. The standard error for the estimated shows that the standard deviation is 2.21637. The absolute mean error (MAE) of 1.33045 is the mean value of the residues. The Durbin-Watson (DW) statistic tries the residues to determine if there is any significant correlation based on the order in which the data is presented in the file. Since the value of P is higher than 0.5%, there is no signal of serial autocorrelation in the residues with a significance value of 5.0%.

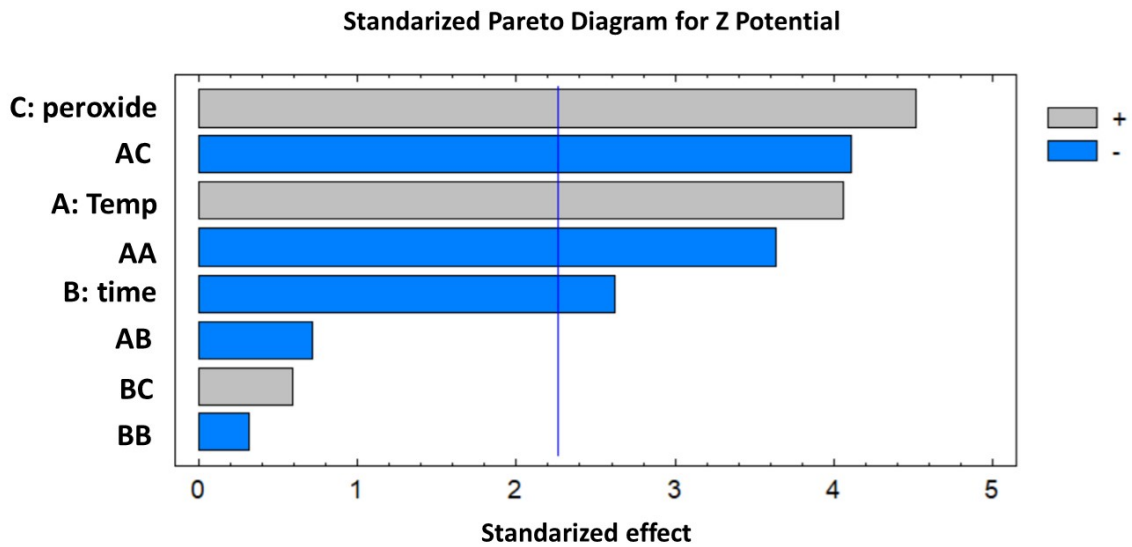

Figure S1. Standardized Pareto Diagram for Z Potential

**Graph of main effects for Z Potential**

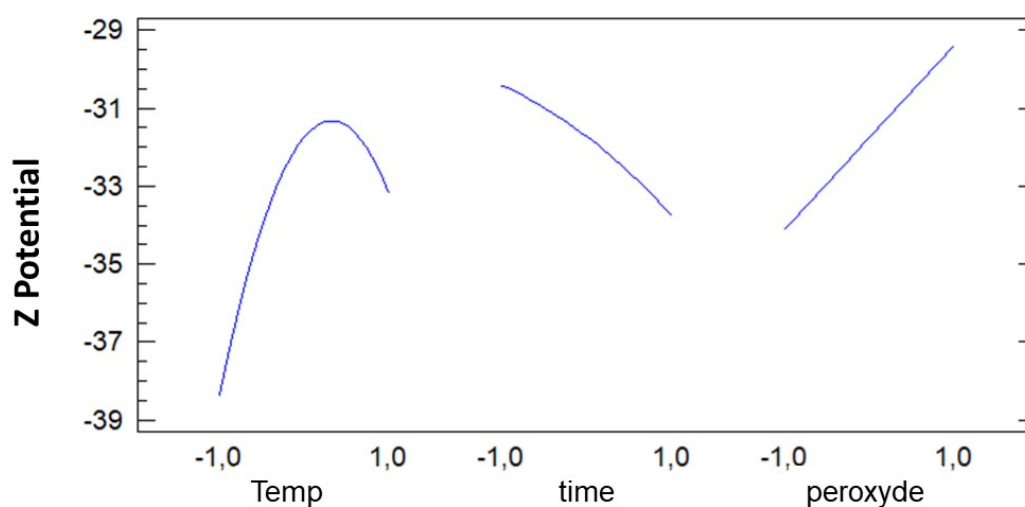

Figure S2. Graph of main effects for Z Potential

Table S3. Yield, total energy delivered to the system, and change in pH during the reaction for the different oxidative conditions.

| SAMPLE | YIELD (%) | E (KJ) | PH CHANGE |
|--------|-----------|--------|-----------|
| USOX1  | 76.65     | 50.54  | -0.59     |
| USOX2  | 74.62     | 100.00 | -0.63     |
| USOX3  | 75.92     | 209.45 | -0.06     |
| USOX4  | 72.18     | 58.40  | -0.95     |
| USOX5  | 72.83     | 95.70  | -1.88     |
| USOX6  | 74.72     | 194.00 | -1.64     |
| USOX7  | 74.03     | 60.39  | -0.22     |
| USOX8  | 76.29     | 133.61 | -0.30     |
| USOX9  | 68.48     | 201.60 | -0.47     |
| USOX10 | 76.29     | 54.83  | -1.51     |
| USOX11 | 74.73     | 113.20 | -2.24     |
| USOX12 | 74.99     | 238.12 | -2.35     |
| USOX13 | 71.94     | 45.95  | -0.63     |
| USOX14 | 73.49     | 87.09  | -0.26     |
| USOX15 | 71.30     | 180.56 | -0.32     |
| USOX16 | 66.55     | 89.28  | -3.15     |
| USOX17 | 69.31     | 171.1  | -2.59     |
| USOX18 | 73.36     | 188.84 | -2.93     |

Table S4. Chemical composition of oxidized lignins.

| SAMPLE | AIL (%)      | ASL (%)      | CA (%)      | ASH (%)     |
|--------|--------------|--------------|-------------|-------------|
| KL     | 73.94 ± 0.93 | 18.99 ± 0.25 | 1.03 ± 0.21 | 6.04 ± 1.06 |
| USOX1  | 87.97 ± 2.67 | 7.61 ± 1.03  | 2.89 ± 0.11 | 1.53 ± 0.97 |
| USOX2  | 87.78 ± 4.80 | 6.92 ± 0.04  | 3.49 ± 0.93 | 1.81 ± 0.33 |
| USOX3  | 87.41 ± 1.82 | 8.00 ± 0.23  | 3.08 ± 0.16 | 1.51 ± 0.08 |
| USOX4  | 86.78 ± 1.32 | 8.43 ± 1.06  | 3.09 ± 0.08 | 1.70 ± 0.68 |

|               |              |             |             |             |
|---------------|--------------|-------------|-------------|-------------|
| <b>USOX5</b>  | 88.92 ± 1.36 | 6.05 ± 0.25 | 2.79 ± 0.23 | 2.24 ± 2.30 |
| <b>USOX6</b>  | 88.37 ± 3.36 | 6.91 ± 0.07 | 3.14 ± 0.02 | 1.58 ± 0.43 |
| <b>USOX7</b>  | 89.32 ± 2.53 | 5.92 ± 0.07 | 3.65 ± 0.46 | 1.11 ± 0.09 |
| <b>USOX8</b>  | 89.75 ± 2.53 | 5.99 ± 0.22 | 3.07 ± 0.06 | 1.19 ± 0.17 |
| <b>USOX9</b>  | 91.23 ± 0.85 | 4.29 ± 0.25 | 3.59 ± 0.48 | 0.89 ± 0.01 |
| <b>USOX10</b> | 89.25 ± 0.67 | 5.99 ± 0.31 | 3.88 ± 0.71 | 0.88 ± 0.20 |
| <b>USOX11</b> | 88.20 ± 1.66 | 6.79 ± 0.43 | 4.11 ± 0.48 | 0.90 ± 0.12 |
| <b>USOX12</b> | 87.41 ± 0.59 | 6.42 ± 0.25 | 4.36 ± 0.46 | 1.81 ± 0.88 |
| <b>USOX13</b> | 92.60 ± 0.32 | 6.29 ± 0.11 | 0 ± 0.00    | 1.11 ± 0.07 |
| <b>USOX14</b> | 89.25 ± 1.24 | 5.40 ± 0.34 | 3.59 ± 4.88 | 1.76 ± 0.45 |
| <b>USOX15</b> | 85.75 ± 2.05 | 4.78 ± 0.18 | 8.48 ± 0.62 | 0.99 ± 0.79 |
| <b>USOX16</b> | 84.02 ± 2.36 | 5.67 ± 0.30 | 8.91 ± 0.58 | 1.40 ± 0.33 |
| <b>USOX17</b> | 86.03 ± 0.84 | 5.50 ± 0.30 | 7.76 ± 1.18 | 0.71 ± 0.02 |
| <b>USOX18</b> | 85.68 ± 1.00 | 4.65 ± 0.13 | 8.70 ± 0.17 | 0.97 ± 0.10 |

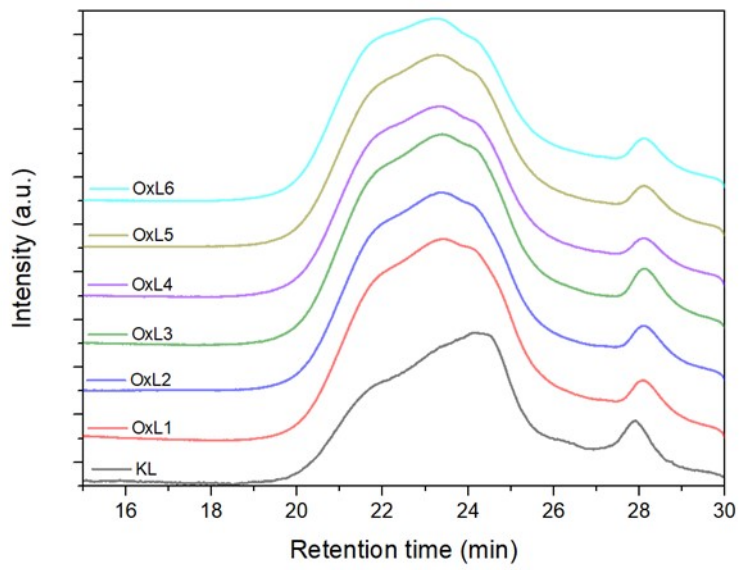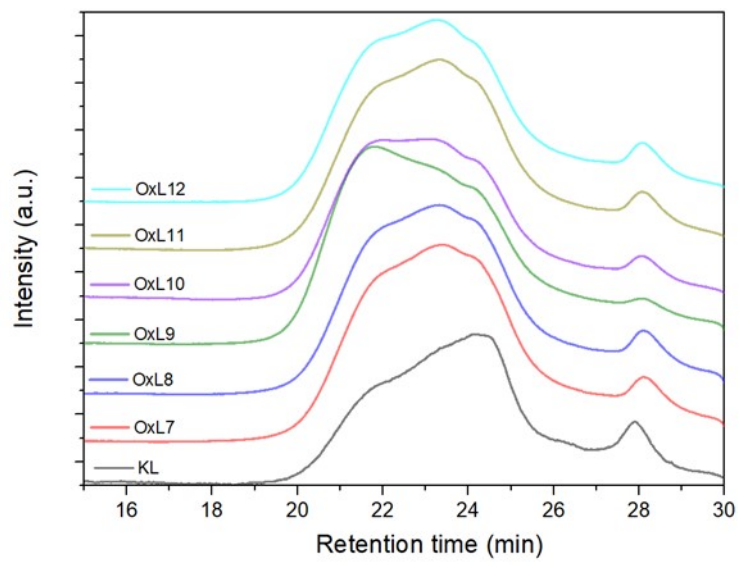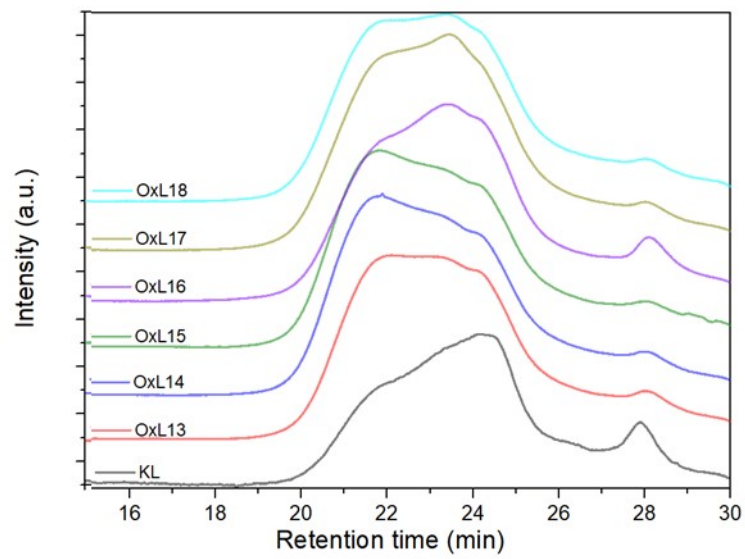

Figure S3. Chromatogram curves of KL and its oxidized samples.

Table S5. Elemental analysis results

|       | C            | H           | N           | S           | O            |
|-------|--------------|-------------|-------------|-------------|--------------|
| KL    | 62.44 ± 0.38 | 5.20 ± 0.02 | 0.31 ± 0.03 | 5.07 ± 0.16 | 26.98 ± 0.54 |
| OxL1  | 64.97 ± 0.13 | 5.69 ± 0.19 | 0.32 ± 0.02 | 5.43 ± 0.11 | 23.60 ± 0.40 |
| OxL2  | 64.87 ± 0.63 | 5.51 ± 0.16 | 0.30 ± 0.02 | 5.47 ± 0.09 | 23.84 ± 0.85 |
| OxL3  | 64.71 ± 0.18 | 5.47 ± 0.03 | 0.33 ± 0.03 | 6.08 ± 0.05 | 23.41 ± 0.28 |
| OxL4  | 64.59 ± 0.50 | 5.45 ± 0.03 | 0.30 ± 0.04 | 4.91 ± 0.15 | 24.75 ± 0.66 |
| OxL5  | 64.49 ± 0.18 | 5.38 ± 0.06 | 0.31 ± 0.02 | 5.04 ± 0.05 | 24.79 ± 0.26 |
| OxL6  | 63.53 ± 0.54 | 5.26 ± 0.08 | 0.28 ± 0.01 | 5.14 ± 0.05 | 25.80 ± 0.66 |
| OxL7  | 64.48 ± 1.08 | 5.28 ± 0.08 | 0.30 ± 0.02 | 5.19 ± 0.16 | 24.75 ± 1.32 |
| OxL8  | 65.25 ± 0.49 | 5.34 ± 0.05 | 0.30 ± 0.02 | 5.46 ± 0.08 | 23.64 ± 0.63 |
| OxL9  | 66.41 ± 0.76 | 5.22 ± 0.09 | 0.33 ± 0.01 | 4.39 ± 0.16 | 23.64 ± 1.00 |
| OxL10 | 64.00 ± 0.09 | 5.68 ± 0.05 | 0.31 ± 0.01 | 4.63 ± 0.03 | 25.39 ± 0.16 |
| OxL11 | 63.53 ± 0.65 | 5.55 ± 0.04 | 0.28 ± 0.03 | 4.88 ± 0.13 | 25.76 ± 0.84 |
| OxL12 | 63.45 ± 0.44 | 5.37 ± 0.12 | 0.30 ± 0.02 | 5.03 ± 0.06 | 25.86 ± 0.54 |
| OxL13 | 66.03 ± 0.33 | 5.45 ± 0.04 | 0.33 ± 0.01 | 4.51 ± 0.09 | 23.68 ± 0.47 |
| OxL14 | 66.00 ± 0.47 | 5.32 ± 0.05 | 0.32 ± 0.02 | 4.34 ± 0.09 | 24.02 ± 0.58 |
| OxL15 | 66.37 ± 0.62 | 5.46 ± 0.01 | 0.34 ± 0.03 | 4.32 ± 0.18 | 23.50 ± 0.83 |
| OxL16 | 64.79 ± 0.16 | 5.48 ± 0.02 | 0.28 ± 0.02 | 4.99 ± 0.07 | 24.45 ± 0.16 |
| OxL17 | 65.83 ± 0.61 | 5.40 ± 0.03 | 0.32 ± 0.01 | 4.07 ± 0.08 | 24.39 ± 0.67 |
| OxL18 | 65.78 ± 0.63 | 5.38 ± 0.01 | 0.31 ± 0.02 | 3.93 ± 0.11 | 24.60 ± 0.77 |

Table S6. FTIR assignments for each frequency range

| Absorption frequency range<br>(cm <sup>-1</sup> ) | Assignment                                                                           |
|---------------------------------------------------|--------------------------------------------------------------------------------------|
| 3400                                              | v(O-H) stretching of phenolic hydroxyl and aliphatic hydroxyl groups                 |
| 2940 and 2840                                     | v(C-H) methyl (-CH <sub>3</sub> ) and methylene (-CH <sub>2</sub> -) groups          |
| 1708                                              | v(C=O) stretching of unconjugated ketones, conjugated aldehydes and carboxylic acids |
| 1610 and 1515                                     | Aromatic skeletal vibrations (guaiacyl-syringyl)                                     |
| 1460                                              | δ(C-H) methyl (-CH <sub>3</sub> ) and methylene (-CH <sub>2</sub> -) groups          |
| 1425                                              | Aromatic skeletal vibrations combined with δ(C-H) (in-plane)                         |
| 1329                                              | v(C-O) syringyl                                                                      |
| 1217                                              | v(C-O) guaiacyl                                                                      |
| 1150                                              | v(C-O) aliphatic ethers                                                              |
| 1033                                              | v(C-O-C) ether linkage and phenolic hydroxyl groups                                  |
| 910                                               | δ(C-H) (out-of-plane) aromatic                                                       |
| 835                                               | v(C-O) aliphatic ethers                                                              |

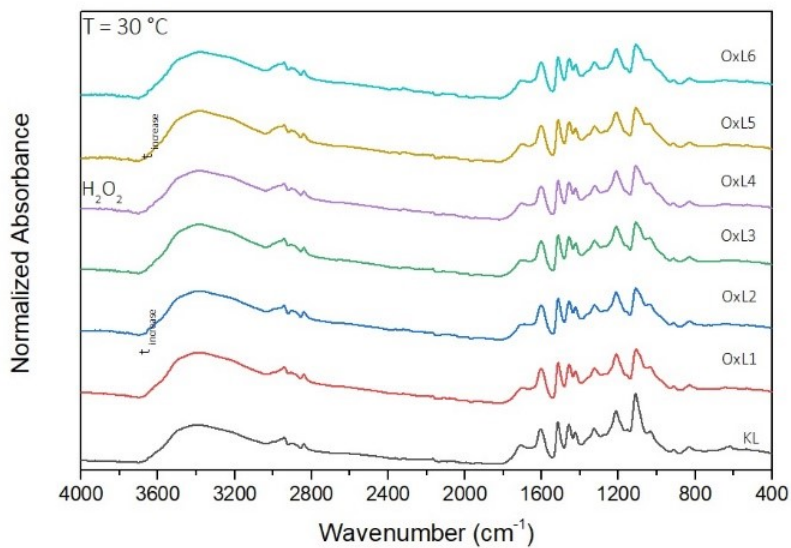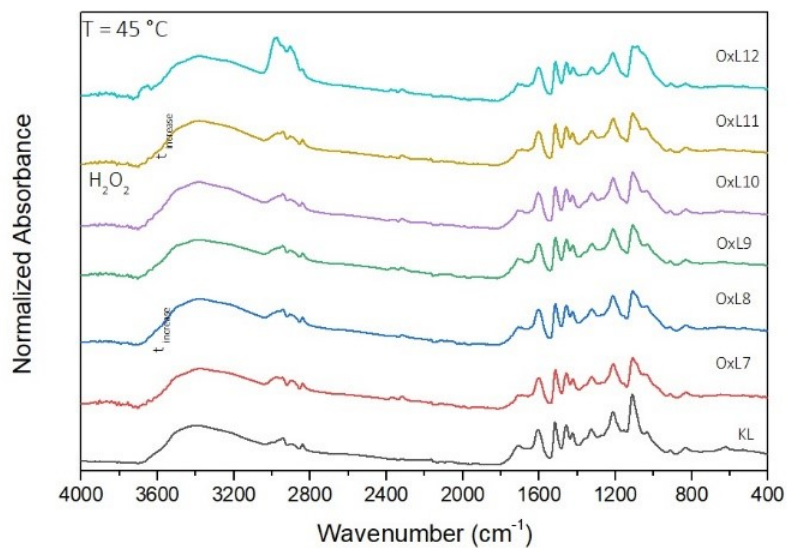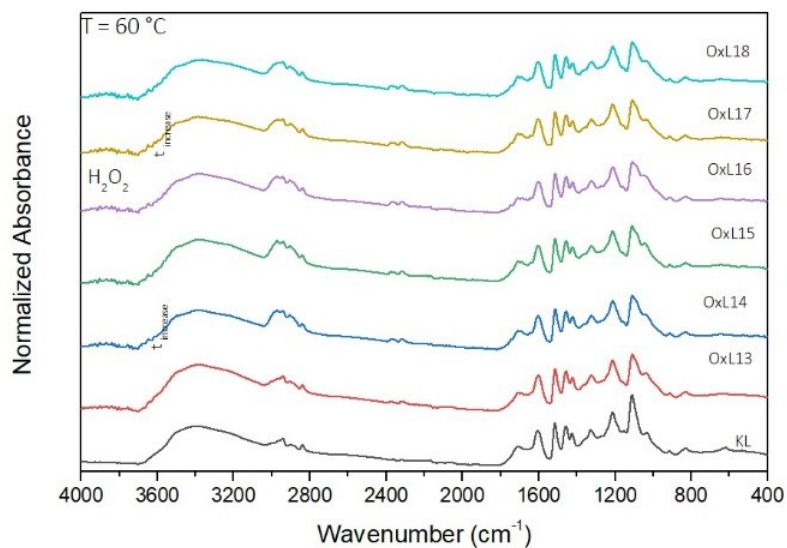

Figure S4. FTIR spectra of KL and oxidized lignin samples.

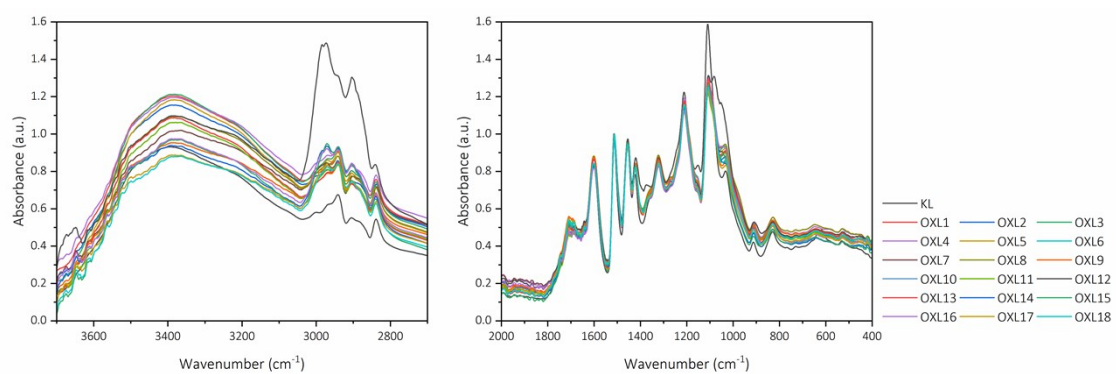

Figure S5. A close-up look to the characteristic bands of the oxidized samples.



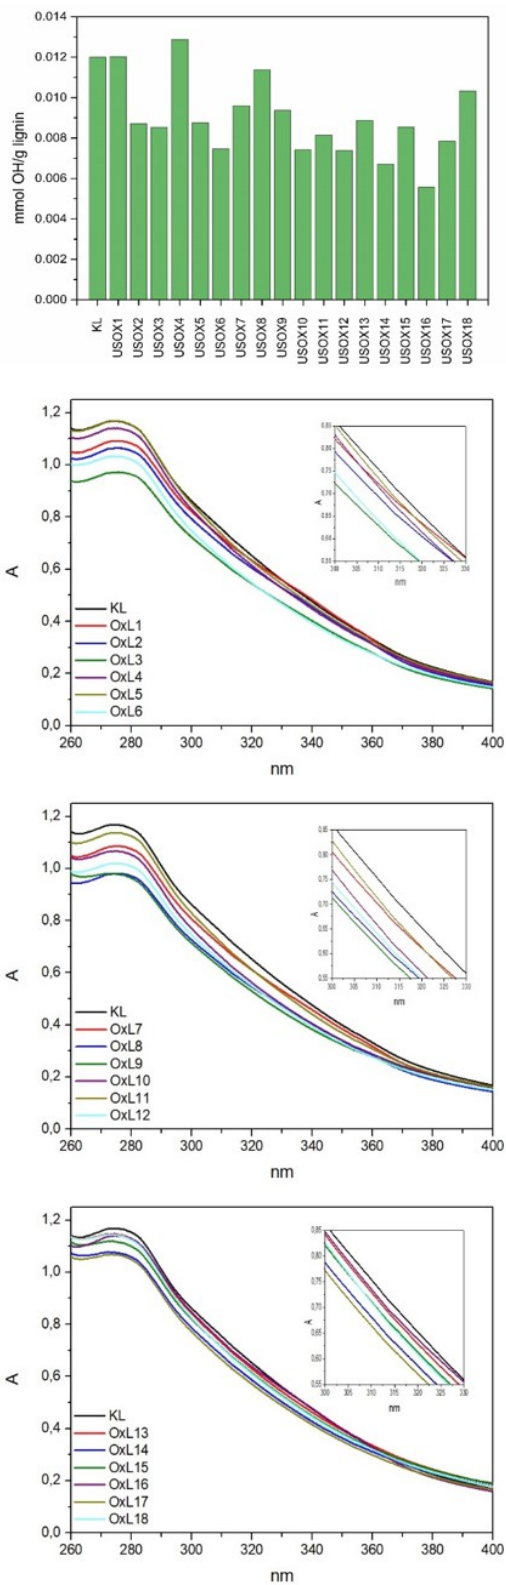

Figure S6 Total Phenolic Content (TPC) and conjugated and non-conjugated OH groups

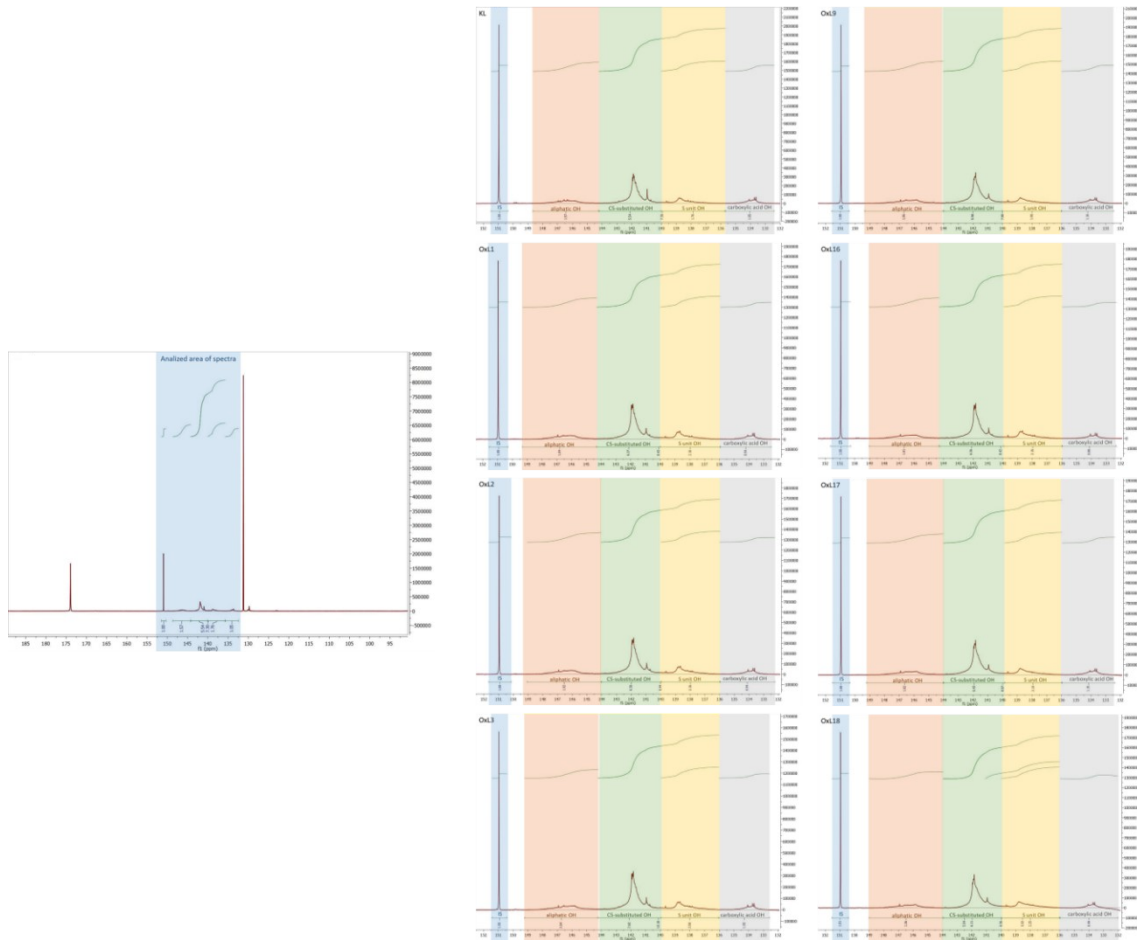

Figure S7.  $^{31}\text{P}$  NMR spectra of KL, OxL1, OxL2, OxL3, OxL9, OxL16, OxL17, and OxL18

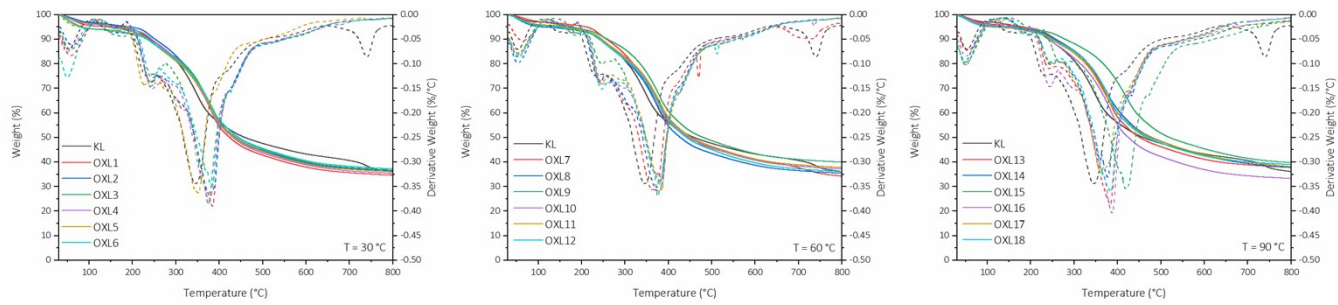

Figure S8. TG and DTG curves obtained for KL and its oxidized samples.

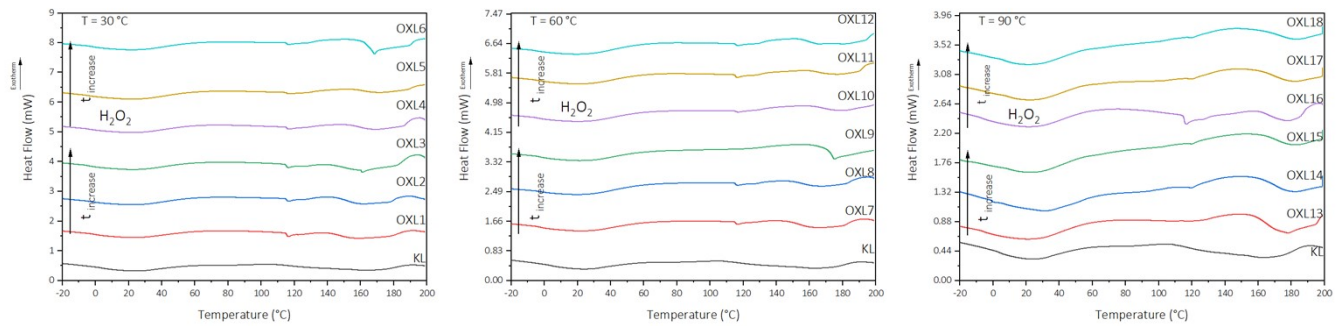

Figure S9. DSC curves of KL and its oxidized samples.

Table S7. Mass loss at 5% and 50% ( $T_{5\%}$  and  $T_{50\%}$ ), degradation stages of KL and oxidized samples, and glass transition temperatures ( $T_g$ ).

|       | $T_{5\%}$<br>(°C) | $T_{50\%}$<br>(°C) | Degradation stages (°C)                       | Char (%)     | $T_g$ (°C)   |
|-------|-------------------|--------------------|-----------------------------------------------|--------------|--------------|
| KL    | 175               | 460                | <b>50/150/175/225/350/425/550/740</b>         | <b>36.05</b> | <b>116.4</b> |
| OxL1  | 150               | 425                | <b>60/160/240/320/375/425/525/600</b>         | <b>34.59</b> | <b>116.6</b> |
| OxL2  | 175               | 440                | <b>60/160/240/300/375/425/525/600</b>         | <b>36.40</b> | <b>116.8</b> |
| OxL3  | 150               | 445                | <b>60/150/175/240/375/425/525/600</b>         | <b>36.67</b> | <b>116.6</b> |
| OxL4  | 200               | 540                | <b>60/175/225/300/360/460/525/650</b>         | <b>40.31</b> | <b>116.9</b> |
| OxL5  | 75                | 440                | <b>60/160/225/250/275/350/375/475/650</b>     | <b>35.94</b> | <b>117.3</b> |
| OxL6  | 75                | 445                | <b>50/150/175/250/300/375/425/525/600</b>     | <b>37.16</b> | <b>116.9</b> |
| OxL7  | 200               | 450                | <b>70/175/220/375/425/475/575/725</b>         | <b>34.20</b> | <b>116.8</b> |
| OxL8  | 100               | 425                | <b>50/190/220/290/310/375/425/525/700</b>     | <b>35.43</b> | <b>116.9</b> |
| OxL9  | 175               | 475                | <b>50/200/250/375/430/525/600</b>             | <b>39.94</b> | <b>100.0</b> |
| OxL10 | 150               | 450                | <b>50/150/190/250/300/375/425/525/600/730</b> | <b>37.16</b> | <b>117.0</b> |
| OxL11 | 150               | 450                | <b>50/150/190/250/280/390/425/525/600/700</b> | <b>37.77</b> | <b>116.6</b> |
| OxL12 | 150               | 450                | <b>50/150/190/250/275/390/425/510/600/700</b> | <b>36.05</b> | <b>117.0</b> |
| OxL13 | 180               | 450                | <b>50/125/190/220/390/425/525/600/700</b>     | <b>37.76</b> | <b>117.8</b> |
| OxL14 | 150               | 475                | <b>50/200/220/375/420/525/600</b>             | <b>37.69</b> | <b>97.1</b>  |
| OxL15 | 150               | 520                | <b>50/220/260/420/475/600/725</b>             | <b>38.89</b> | <b>97.0</b>  |
| OxL16 | 150               | 425                | <b>50/150/175/250/300/390/425/525/675</b>     | <b>33.28</b> | <b>116.7</b> |
| OxL17 | 100               | 475                | <b>50/125/190/220/375/425/525/600/675</b>     | <b>38.05</b> | <b>97.2</b>  |
| OxL18 | 100               | 475                | <b>50/200/250/300/390/425/525/600/700</b>     | <b>38.95</b> | <b>97.2</b>  |

\*In red and bold the temperatures in which the main degradation occurred. In black bold the other significant degradations.

Table S8. Particle aggregation type and size, and particle size in mm of KL and oxidized samples.

| Sample | Particle aggregation type | Average particle size range (nm) |
|--------|---------------------------|----------------------------------|
| KL     | Big agglomerations        | 124.1 ± 34.6                     |
| OxL1   | Small agglomerations      | 153.0 ± 39.9                     |
| OxL2   | Medium aggregates         | 25.9 ± 2.8                       |
| OxL3   | Free particles            | 25.8 ± 4.0                       |
| OxL9   | Small aggregates          | 17.8 ± 2.7                       |
| OxL16  | Small agglomerates        | 144.0 ± 25.5                     |
| OxL17  | Free particles            | 123.5 ± 71.0                     |
| OxL18  | Big aggregates            | 103.7 ± 67.8                     |
